# Supplementary material for: Fabrication and Characterization of Zeolite ZSM-12@MOF-74 Nanoporous Coordination Polymer Nanocomposite for removal of environmental toxic substances
Source: Research Square preprint supplement (doi:10.21203/rs.3.rs-361844/v1), 2021-03-31
Supplement: Supplementary file 1 [file 0e55b804e0675cd11b56d77a.docx]

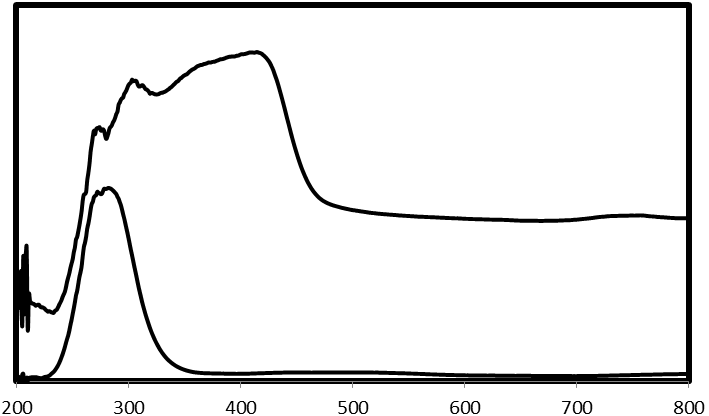


**Wavelength (nm)**

**Absorbance (a.u)**

**a**

**b**

**A**

**B**

**b**

**a**

Fig. S1. (A) Diffuse reflectance spectra of the (a) ZSM-12, (b) ZSM-12@MOF core@shell. (B) N2 adsorption-desorption isotherm of the (a) MOF-74 and (b) ZSM-12@MOF-74(Zn) samples.
