# Supplementary material for: Fabrication and Characterization of Zeolite ZSM-12@MOF-74 Nanoporous Coordination Polymer Nanocomposite for removal of environmental toxic substances
Source: Research Square preprint supplement (doi:10.21203/rs.3.rs-361844/v1), 2021-03-31
Supplement: Supplementary file 2 [file 240bd456d99bb82df1fe3de1.docx]

**a**

**Removal (%)**

**Recycle times**

**b**

**Intensity (a.u)**

*****

*****

*****

***MOF-74**

*****

**2Ɵ**

Fig. S2. (a) Effect of recycle times of ZSM-12@MOF-74 on the MB adsorption capacity (room temperature, C0 = 10 mg/L, catalyst amount = 0.4 g/l, pH = 9, contact time = 30 min) and (b) XRD pattern of ZSM-12@MOF-74 core@shell after visible light irradiation.
