# Supplementary material for: Fabrication and Characterization of Zeolite ZSM-12@MOF-74 Nanoporous Coordination Polymer Nanocomposite for removal of environmental toxic substances
Source: Research Square preprint supplement (doi:10.21203/rs.3.rs-361844/v1), 2021-03-31
Supplement: Supplementary file 3 [file 9913cef79d27350547d1b2cb.docx]

**Graphical Abstract**


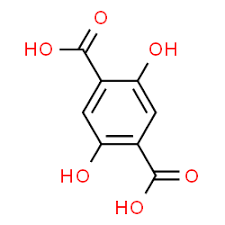

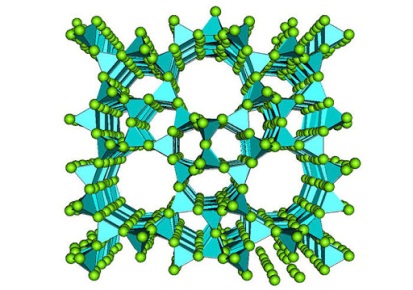

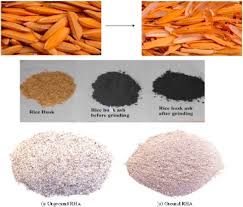

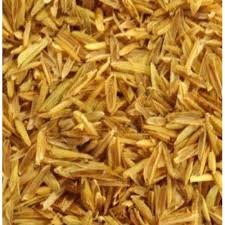


**Rice Husk**

**Rice Husk Ash**

**ZSM-12**


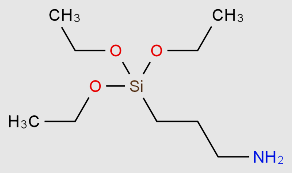

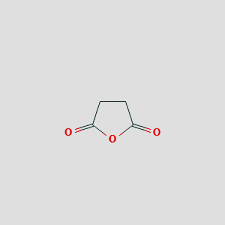

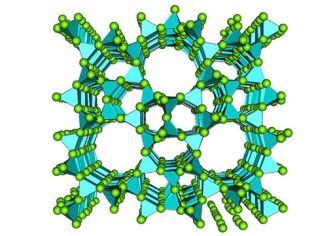


**HOOC-**

**HOOC-**

**-COOH**

**-COOH**

**-COOH**

**-COOH**

**-COOH**

**-COOH**

**-COOH**

**-COOH**

**Zn2+**


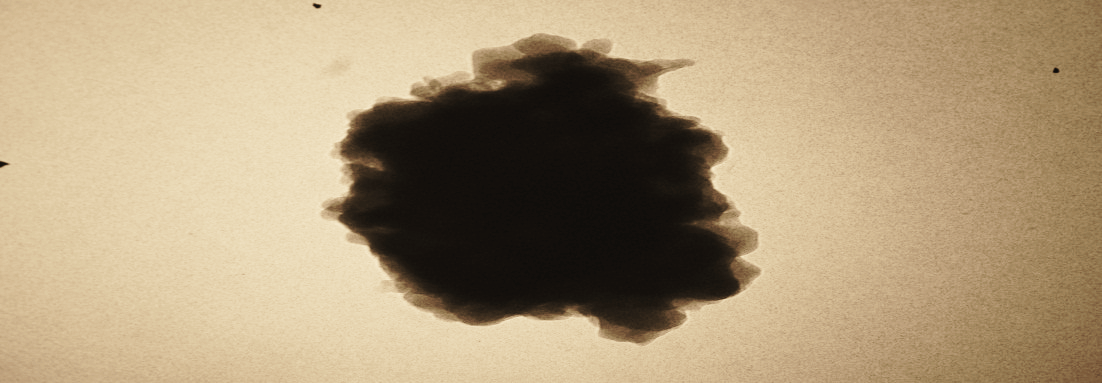


**ZSM-12@MOF-74**
