# Supplementary material for: Fabrication and Characterization of Zeolite ZSM-12@MOF-74 Nanoporous Coordination Polymer Nanocomposite for removal of environmental toxic substances
Source: Research Square preprint supplement (doi:10.21203/rs.3.rs-361844/v1), 2021-03-31
Supplement: Supplementary file 5 [file dd89becbc9fc310de7c62d8e.docx]

**Supporting Information**

**Fabrication and Characterization of Zeolite ZSM-12@MOF-74 Nanoporous Coordination Polymer Nanocomposite for removal of environmental toxic substances**

Azita Albouyeh, Afshin Pourahmad*, Hassan Kefayati

*Department of Chemistry, Rasht Branch, Islamic Azad University, Rasht, Iran*

* Corresponding author E-mail: [pourahmad@iaurasht.ac.ir](mailto:pourahmad@iaurasht.ac.ir); afshinpourahmad@yahoo.com


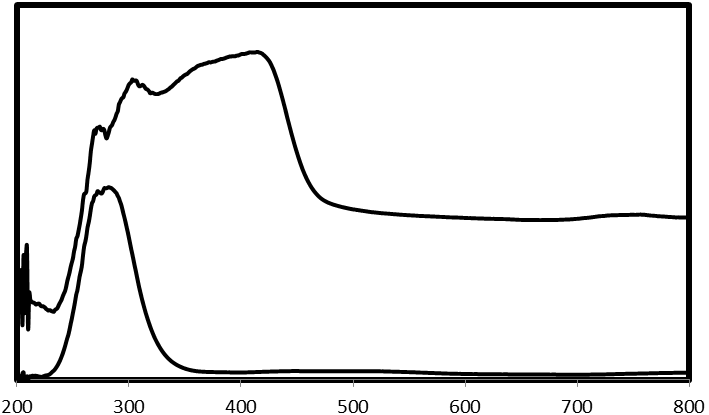


**Wavelength (nm)**

**Absorbance (a.u)**

**a**

**b**

**A**

**B**

**b**

**a**

Fig. S1. (A) Diffuse reflectance spectra of the (a) ZSM-12, (b) ZSM-12@MOF core@shell. (B) N2 adsorption-desorption isotherm of the (a) MOF-74 and (b) ZSM-12@MOF-74(Zn) samples.

**a**

**Removal (%)**

**Recycle times**

**b**

**Intensity (a.u)**

*****

*****

*****

***MOF-74**

*****

**2Ɵ**

Fig. S2. (a) Effect of recycle times of ZSM-12@MOF-74 on the MB adsorption capacity (room temperature, C0 = 10 mg/L, catalyst amount = 0.4 g/l, pH = 9, contact time = 30 min) and (b) XRD pattern of ZSM-12@MOF-74 core@shell after visible light irradiation.
